# Supplementary material
Source: publisher figshare collection journal article supplement (https://acs.figshare.com/ndownloader/files/4107424)

## Supporting information

**Figure S1.** Mass spectra of *ex in vivo* Bevacizumab samples after incubation in vitreous humour from (a) day 0, (b) day 7 to (c) day 14. Structural heterogeneity peaks were found along with time.

(a)

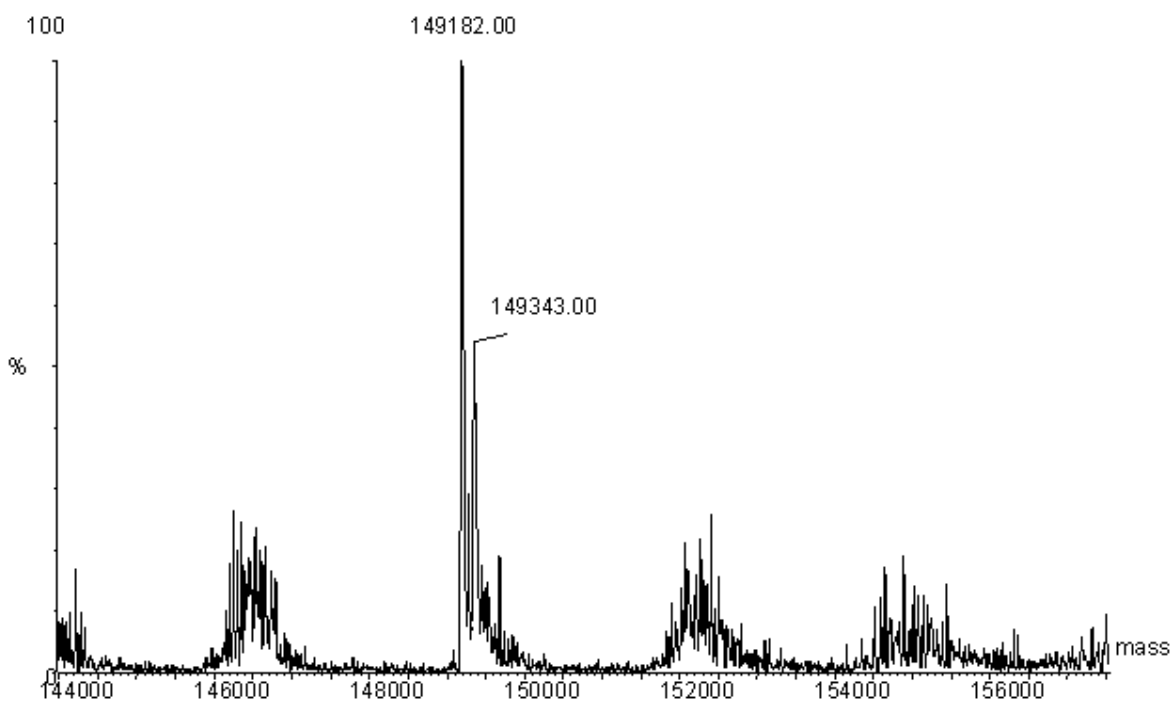

(b)

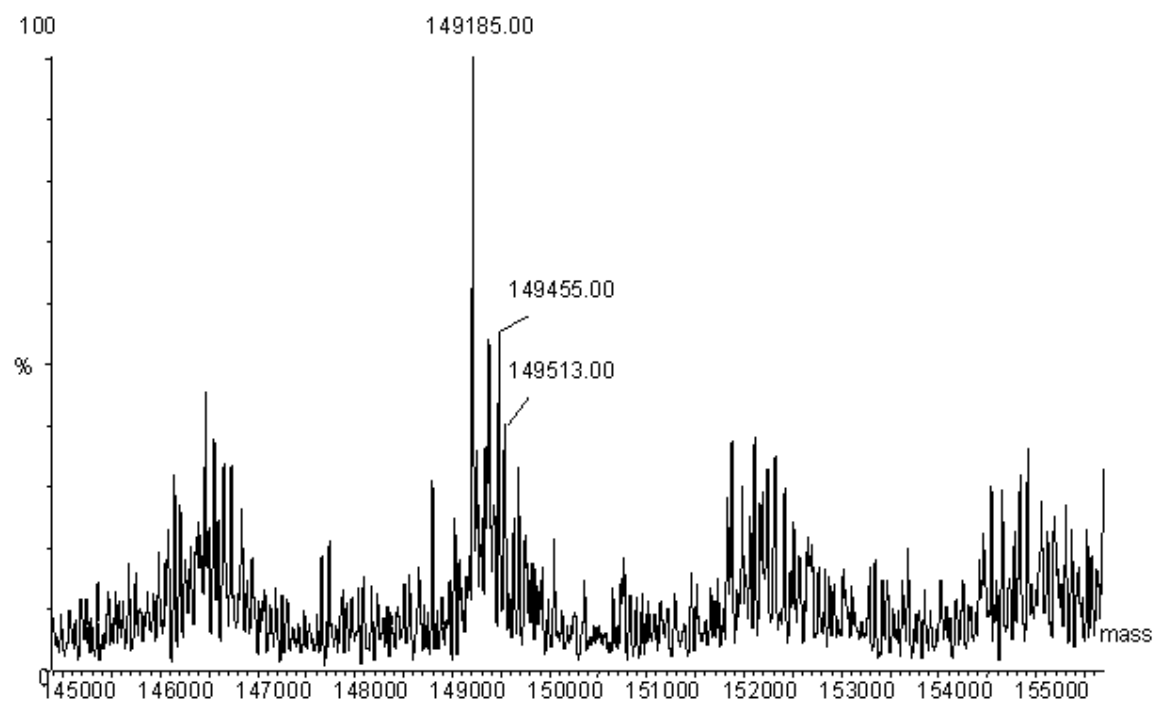

(c)

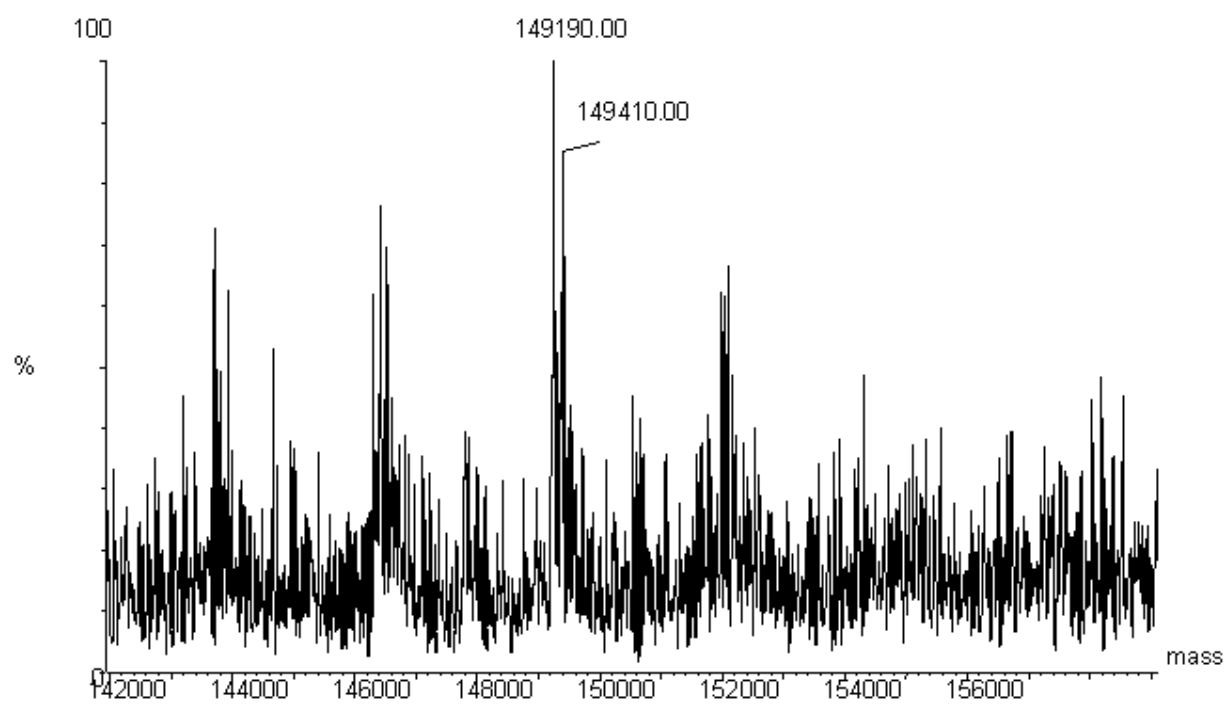

**Figure S2.** Chromatograms (a) and mass spectra of standard Bevacizumab spiked in vitreous humor and vitreous samples from 1, 4 and 7 days after intra-vitreous injection following isolation and DTT reduction. The heavy and light chains were co-eluted. (b-e) They showed the respective mass spectrum of the Bevacizumab from spiked standard, day 1 to day 7. (b) It showed mass 23451.5 m/z was the mass of light chain, the mass of 51154.5 m/z was the mass of heavy chain and the mass 51316 m/z was the mass of heavy chain with an additional galactose on the glycan chain. (c) It showed similar mass spectrum whereas the heavy was becoming heterogeneous from (d – e).

(a)

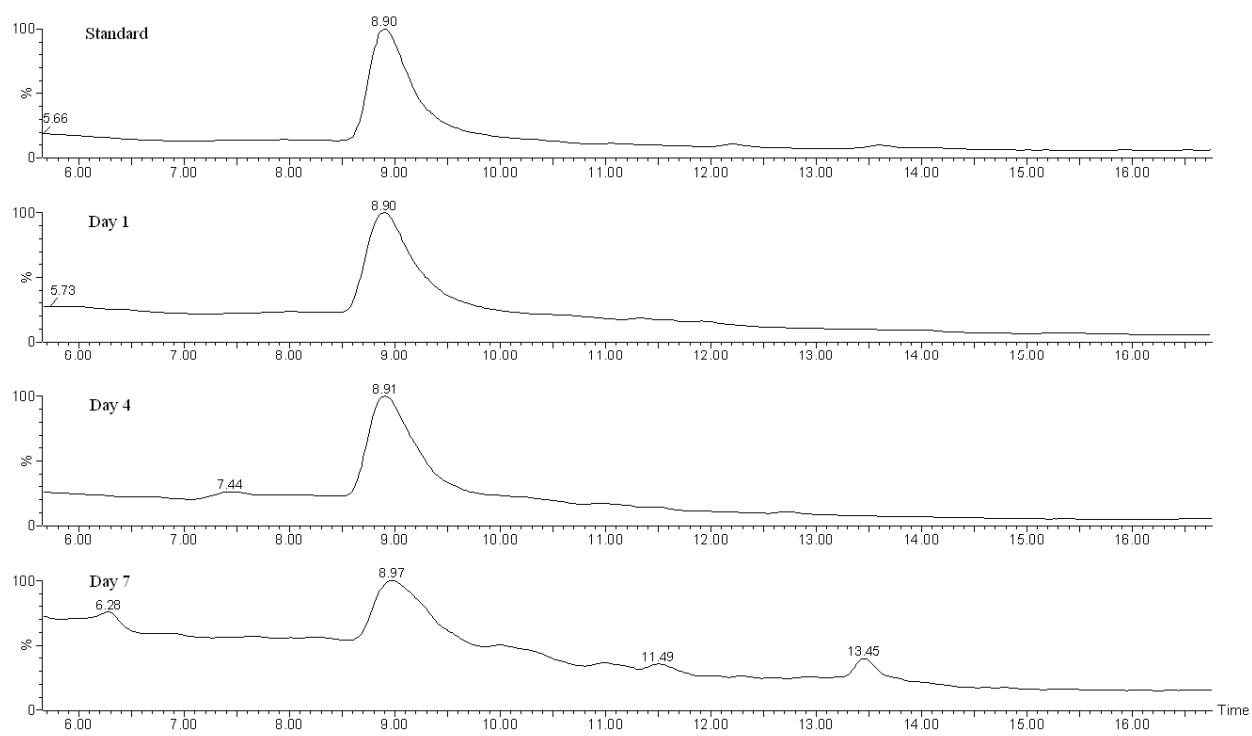

(b)

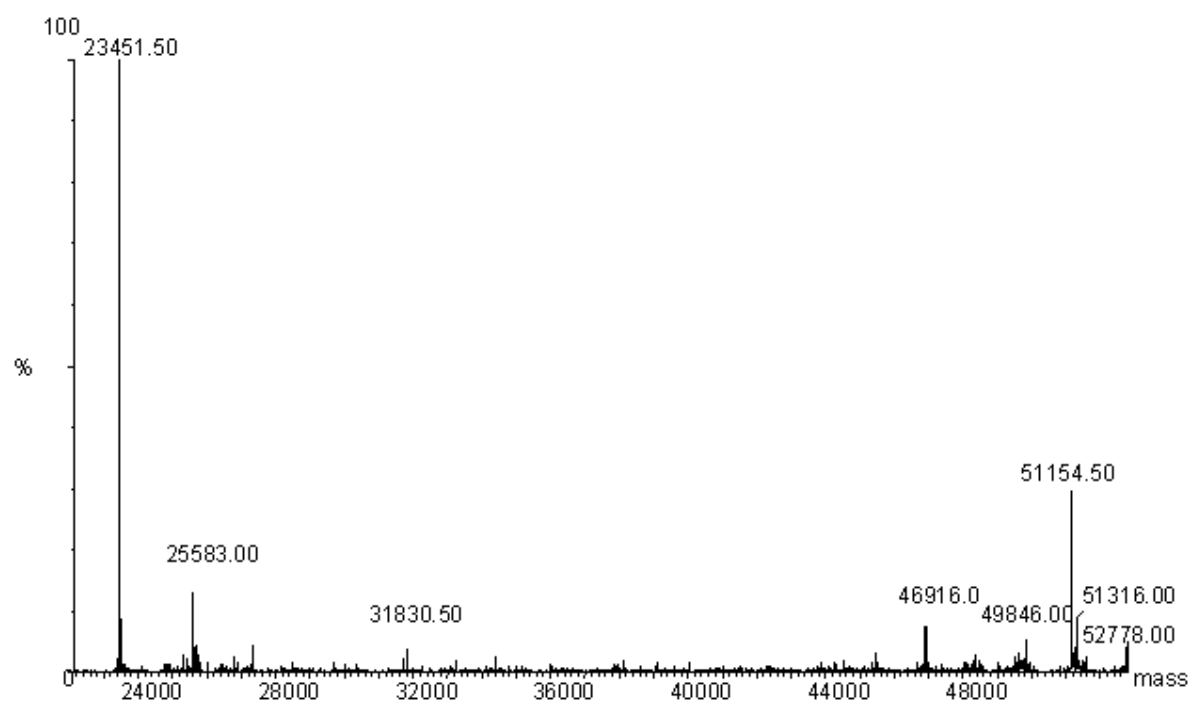

(c)

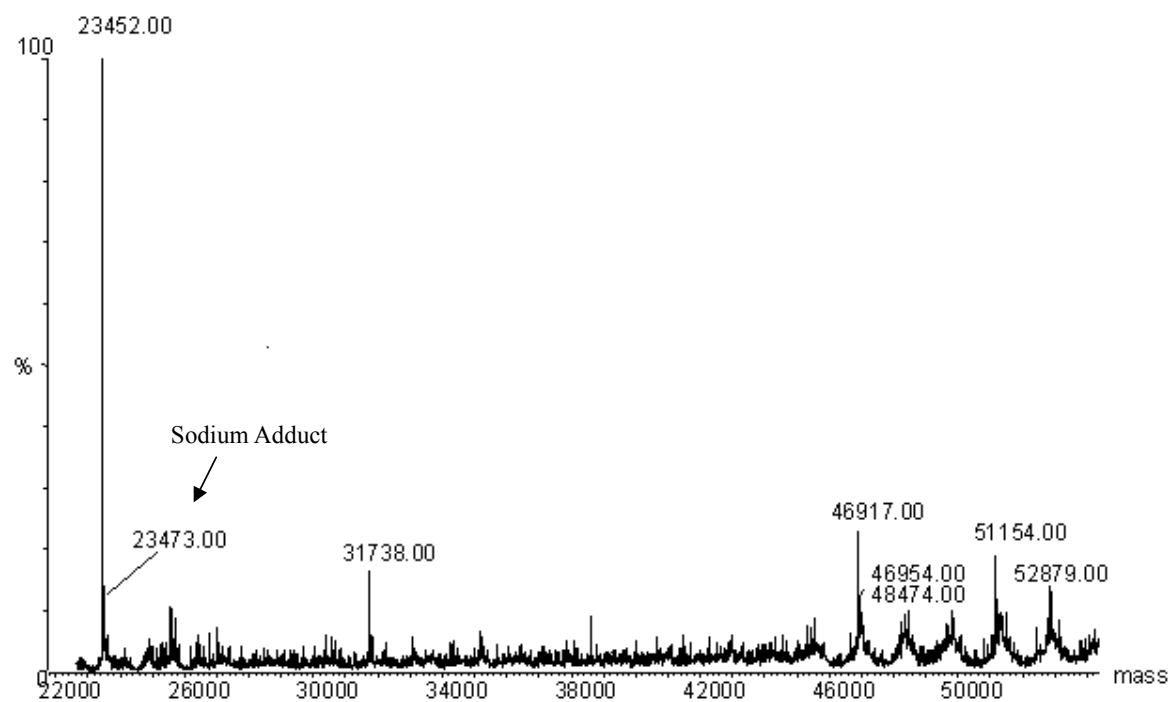

(d)

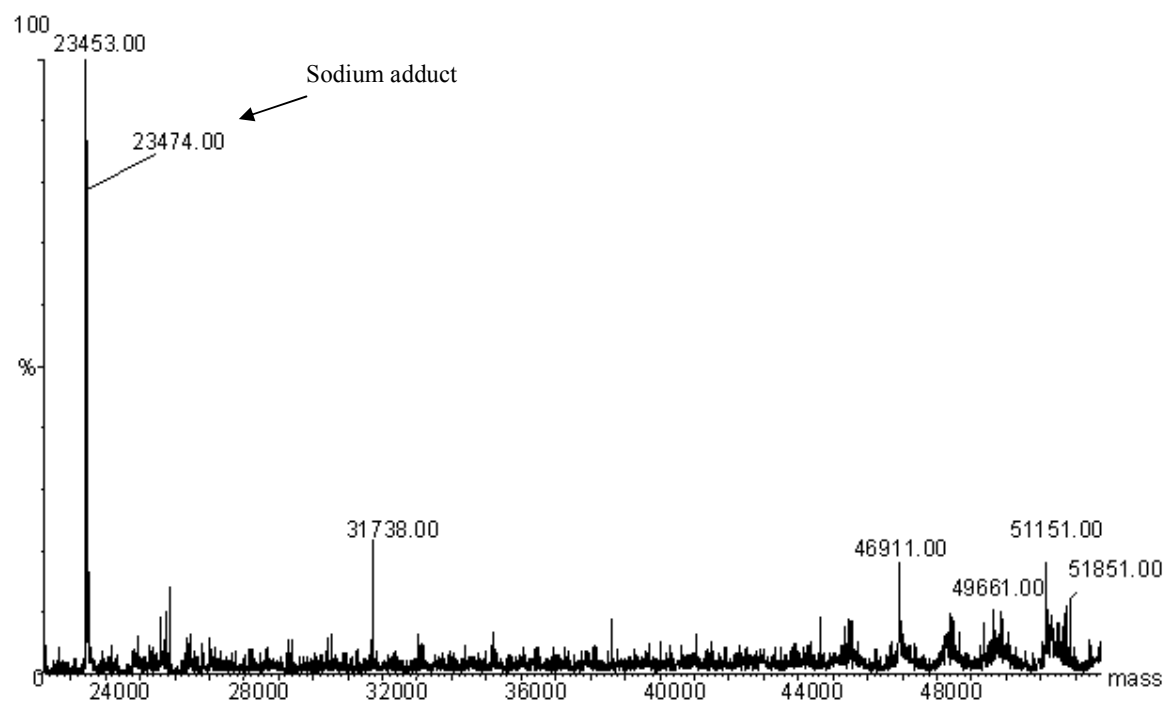

(e)

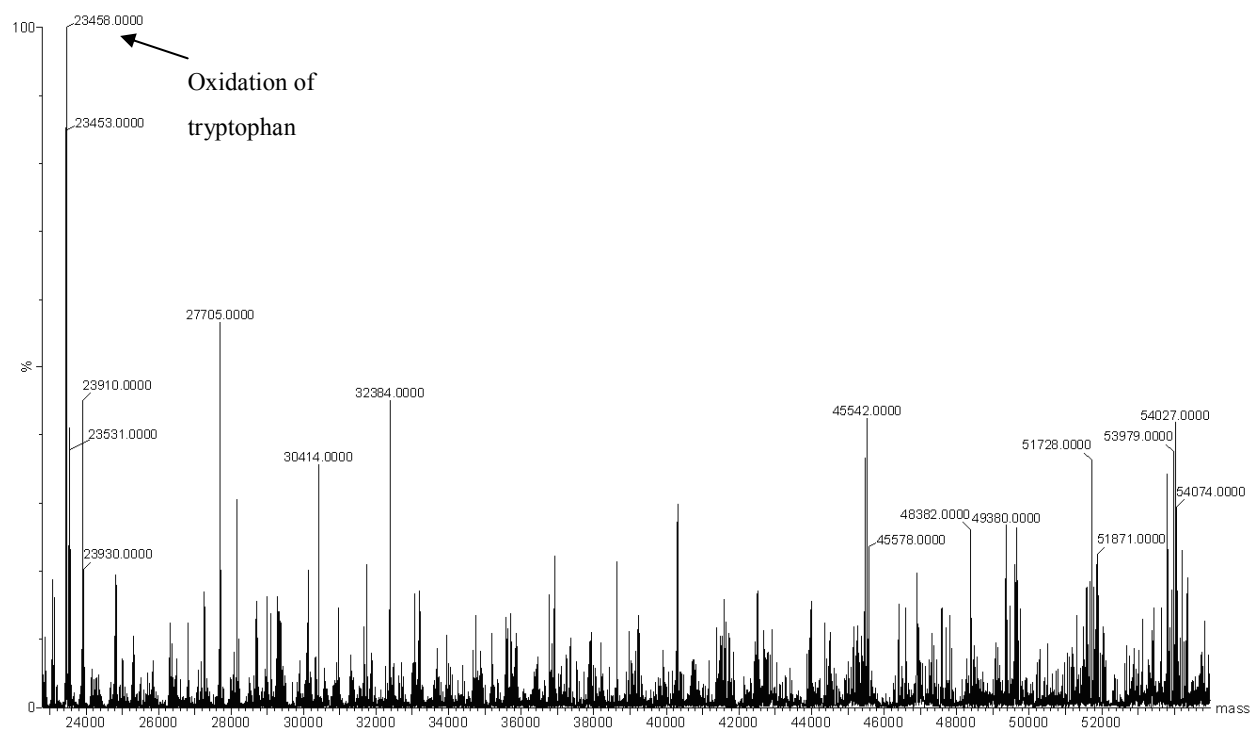

**Figure S3.** LCMS chromatograms of spiked Bevacizumab in vitreous humor and 1, 4 and 7

days after intravitreal injection following Poros G/20 isolation, deglycosylated and DTT

reduction.

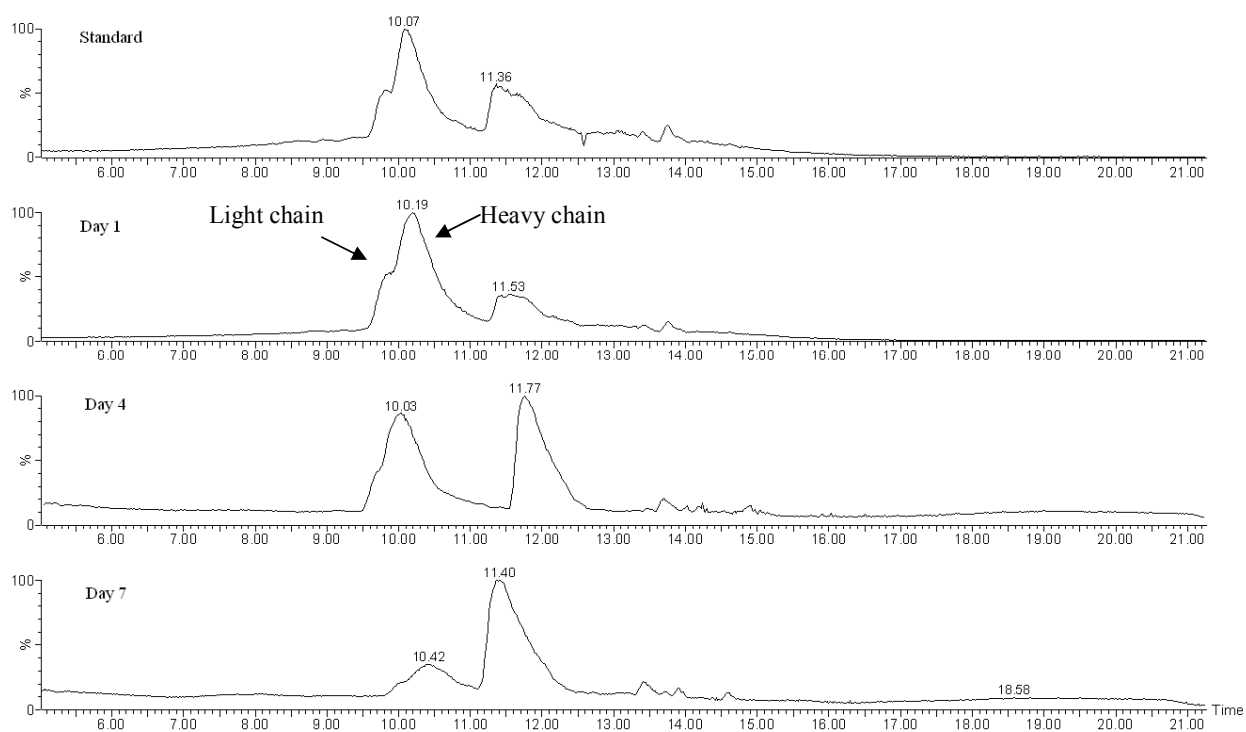

**Figure S4.** Mass spectrum of spiked Bevacizumab in vitreous humor after deglycosylation by PNGase F. The mass was the mass of intact Bevacizumab minus two times of Go glycan.

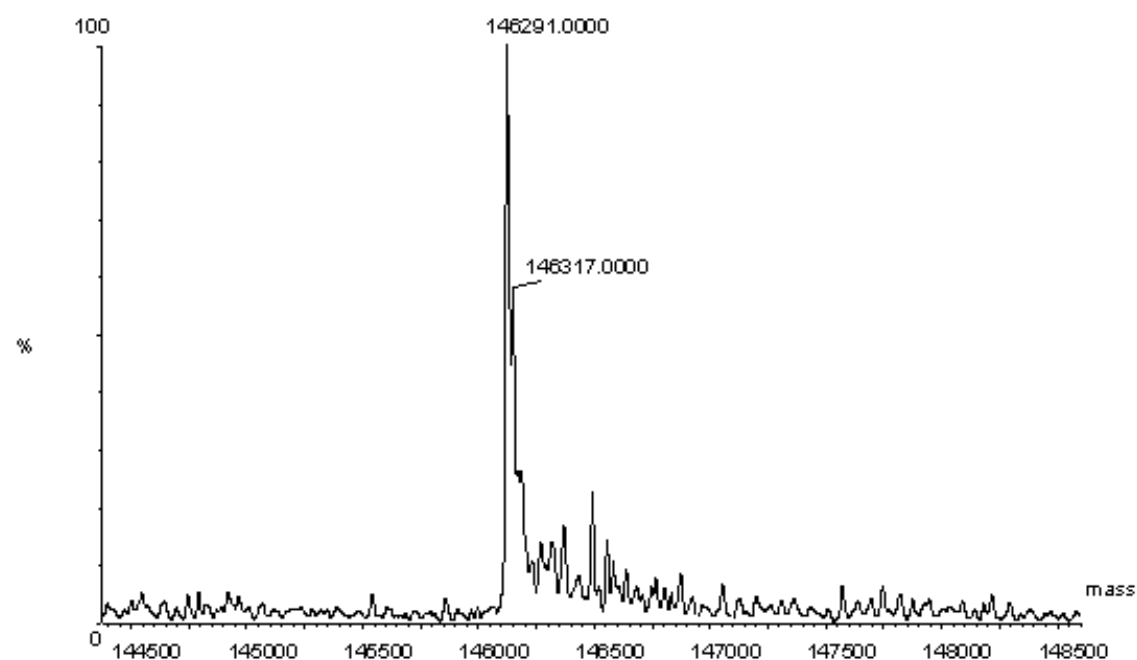

**Figure S5.** Difference of relative Ka at day 1, 7, and 21 respected to the relative Ka at 4 hours after intra-vitreous injection of three rabbit eyes. The symbol \* shows significant difference between the results of day 21 to day 1 and day 7 calculated by ANOVA post hoc Dunnett test ( $p < 0.05$ ).

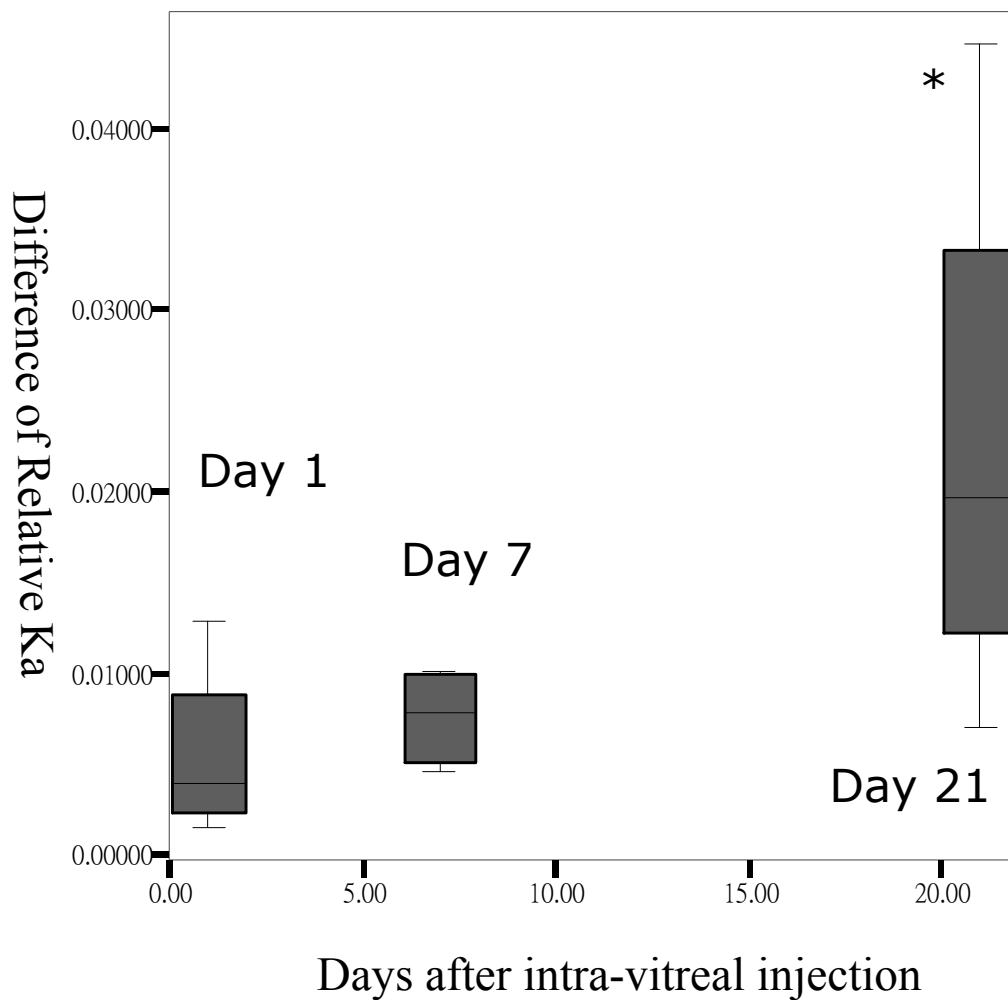

**Figure S6.** LCMS chromatograms of Bevacizumab after purified by Poros G/20 affinity column and trypsin digestion treatment. The samples were Bevacizumab standards and vitreous samples after different days of intra-vitreous injection.

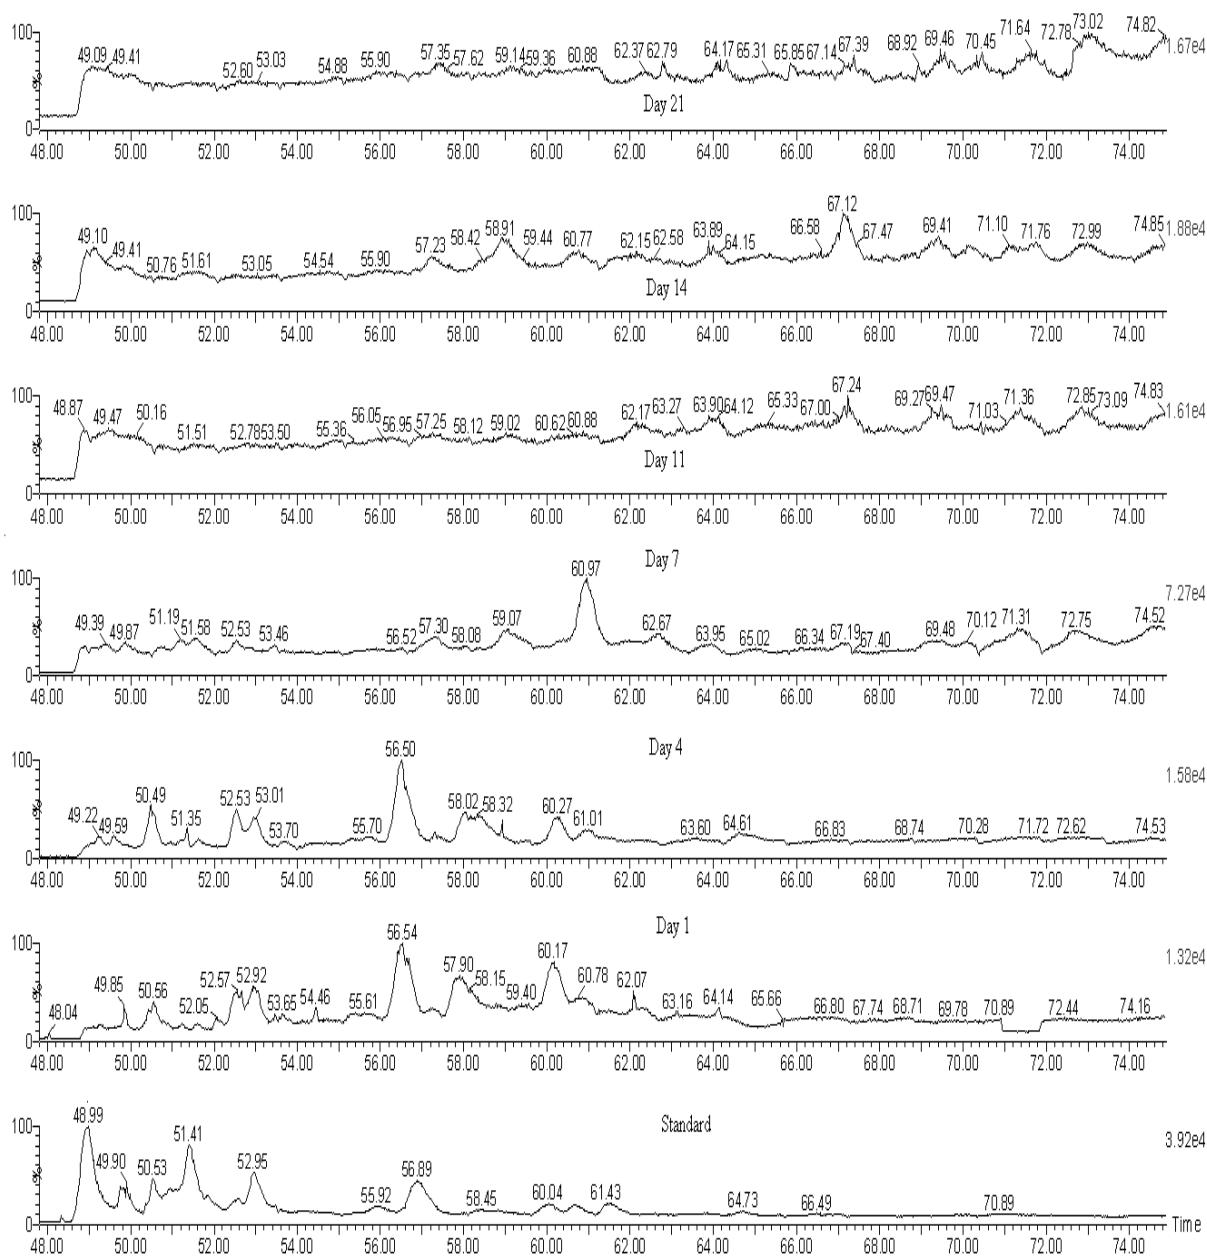

Supplement: Supplementary file 1 [file 4107424]
